# Supplementary material for: AgRP1 modulates breeding season-dependent feeding behavior in female medaka
Source: eLife journal article supplement (doi:10.7554/elife.100996), 2024-10-02
Supplement: fig1-code1 [file Figure1Source code1.pdf › eLife-VOR-RA-2024-100996/Figure1Source code1.pdf]

#Copyright Kimura Tomoki & Shinji Kanda @ Dept.Biol.Sci, Grad.Sch.Sci, The University of Tokyo

#This script can be run under python 3.5. OpenCV3 should be installed.

#a key add the total number

#z key reset the total number

#q key quit the program

#space key pauses the program

#this script can be run with 3 parameters like python thisfilename.py 5 3 1

```
import sys
```

```
import numpy as np
```

```
import cv2
```

```
import time
```

```
def conv(frame, args):
```

```
    gray = cv2.cvtColor(frame, cv2.COLOR_BGR2GRAY)
```

```
    #binarization.INV means black and white inversion. blockSize means pixel cutoff. 3, 5, 7, etc.
```

```
    th1 = cv2.adaptiveThreshold(gray,255,cv2.ADAPTIVE_THRESH_GAUSSIAN_C,¥  
                                cv2.THRESH_BINARY_INV,29,8)
```

```
    #iterations – number of times dilation is applied.anchor – anchor of the kernel that indicates  
the relative position of a filtered point within the kernel; the anchor should lie within the kernel;  
default value (-1,-1) means that the anchor is at the kernel center.
```

```
    kernel = np.ones((int(args[1]),int(args[1])),np.uint8)
```

```
    dilation = cv2.dilate(th1, kernel, iterations =1)
```

```
    erosion = cv2.erode(dilation,kernel,iterations = int(args[2]))
```

```
    dilation = cv2.dilate(erosion, kernel, iterations =int(args[3]))
```

```
    return dilation
```

```
#draw a circle after detemining the center of each shape
```

```
def CoG(contours,frame):
```

```
    arr=[]
```

```
    for i in contours:
```

```
        x_=0
```

```
        y_=0
```

```
        for j in i:
```

```
            x_ += j[0][0]
```

```
            y_ += j[0][1]
```

```
        arr.append([int(x_/len(i)), int(y_/len(i))])
```

```
    arr = np.array(arr)
```

```
    for i in arr:
```

```
        cv2.circle(frame,tuple(i), 5, (0,255,0), 1)
```

```
def count(frame,gray):
```

```
    #edge detection
```

```
    img, contours, hierarchy =
```

```
cv2.findContours(gray,cv2.RETR_EXTERNAL,cv2.CHAIN_APPROX_SIMPLE)
```

```

    CoG(contours,frame)
    #img = cv2.drawContours(frame, contours, -1, (0,255,0), 1)

    return contours
totalNum = 0
lastLog = 0
pressCount = 0
argvs = sys.argv
argc = len(argvs)
if (argc != 4):
    print ('Usage: python count.py [kernel] [erosion] [dilation]¥nkernel...Increase the parameter to
    reduce the noise. It increases the possibility to misditection of the object')
    print('erosion...Increase this value when you want to distinguish the objects conted as
    one.¥ndilation...Increase this value when one object is double counted. Too large value may
    cause multiple objects counted as one')
    quit()          # Program End
cap = cv2.VideoCapture(0) #0 is the number of the camera

print('fps={0:2d}, w={1}, h={2}'.format(int(cap.get(cv2.CAP_PROP_FPS)),cap.get(3), cap.get(4)))
print('kernel={0}, iterations of erosion={1}, iterations of
dilation={2}'.format(int(argvs[1]),int(argvs[2]),int(argvs[3])))
while(cap.isOpened()):
    ret, frame = cap.read()

    if ret:
        fin_img=conv(frame, argvs)
        contours=count(frame,fin_img)    #Edge detection, draw circles
        cv2.putText(frame,"realtime#="+str(len(contours)),(10,40),
cv2.FONT_HERSHEY_COMPLEX, 1.0,(0, 0, 255))    #print number of object
        descrip = "space:pause q:quit"
        cv2.putText(frame,"space:pause q:quit a:add z:reset",(10,440),
cv2.FONT_HERSHEY_COMPLEX, 0.5,(0, 255, 0))    #print number of object
        cv2.putText(frame,"total#=" + str(totalNum) + "(" + str(pressCount) + ")",(10,80),
cv2.FONT_HERSHEY_COMPLEX, 1.0,(0, 0, 255))    #total number
        cv2.imshow('frame',frame)    #Out put 1 frame in the window
    else :
        break
    keycode = cv2.waitKey(1)    #wait 1ms for key input
    if keycode == ord('q'): #when q is pressed, program ends
        break
    elif keycode == ord(' '):    #when space key was pressed
        while(True):
            keycode = cv2.waitKey(0)    #wait key press forever

```

```

        if(keycode== ord(' ')):    #space key: pause
            break
        elif(keycode== ord('q')): #q key stops the program
            cap.release()
            out.release()
            cv2.destroyAllWindows()
            quit()
    elif keycode== ord('a'): #when a key is pressed,add the number to the total number
        if time.time() > lastLog+1: # avoid multiple count in a short time
            totalNum = len(contours) + totalNum
            lastLog = time.time()
            pressCount = pressCount+1

    elif keycode== ord('z'): #when z key is pressed, reset the total number and press count.
        totalNum = 0
        pressCount = 0

cap.release()
cv2.destroyAllWindows()

```

**Figure 1-Source code 1: The code of “Shrimp-counter” system**
