# Supplementary material for: AgRP1 modulates breeding season-dependent feeding behavior in female medaka
Source: eLife. 2025 May 29;13:RP100996. doi: 10.7554/eLife.100996 (PMC12122003; doi:10.7554/eLife.100996)
Supplement: Figure 1—figure supplement 2—source data 1. [file elife-100996-fig1-figsupp2-data1.xlsx]

## Sheet: Sheet1
AgRP			NPY
LD	SD		LD	SD
4.66786	0.755092		56.4811	30.4
3.95664	1.34986		86.1755	27.618
2.62471	0.621959		72.757	33.6604
