# Supplementary material for: AgRP1 modulates breeding season-dependent feeding behavior in female medaka
Source: eLife. 2025 May 29;13:RP100996. doi: 10.7554/eLife.100996 (PMC12122003; doi:10.7554/eLife.100996)
Supplement: Figure 1—source data 1. [file elife-100996-fig1-data1.xlsx]

## Sheet: Sheet1
Figure 1B			Figure 1C
LD	SD		LD	SD
0.802132	0.743837		0.89365	0.993114
1.03006	0.568954		0.954858	1.08493
1.0767	0.977015		0.778883	1.25325
1.12333	0.907062		1.28386	0.778883
0.95428	0.982845		1.11553	0.993114
1.00092	0.877915		0.916603	1.23795
1.01257	0.802132		1.05432	0.947207
