# Supplementary material for: AgRP1 modulates breeding season-dependent feeding behavior in female medaka
Source: eLife. 2025 May 29;13:RP100996. doi: 10.7554/eLife.100996 (PMC12122003; doi:10.7554/eLife.100996)
Supplement: Figure 2—figure supplement 1—source data 1. [file elife-100996-fig2-figsupp1-data1.xlsx]

## Sheet: NAT
NAT
Fed	FR
74	15
66	55
58	21
79	44

## Sheet: NVT
NVT
Fed	FR
80	77
126	92
200	41
174	104

## Sheet: NRL
NRL
Fed	FR
224	44
368	153
257	126
268	61

## Sheet: Total
Total
Fed	FR
378	136
560	300
515	188
521	209
