# Supplementary material for: AgRP1 modulates breeding season-dependent feeding behavior in female medaka
Source: eLife. 2025 May 29;13:RP100996. doi: 10.7554/eLife.100996 (PMC12122003; doi:10.7554/eLife.100996)
Supplement: Figure 2—source data 1. [file elife-100996-fig2-data1.xlsx]

## Sheet: Sheet1
Figure 2G-H
agrp1		agrp2		npya		npyb
Fed	Fasted	Fed	Fasted	Fed	Fasted	Fed	Fasted
0.708074	1.12003	0.996189	1.34551	1.04109	0.912747	0.90681	0.650546
0.603677	1.51066	1.2573	0.914033	0.932115	0.886443	1.00927	0.481165
0.405143	1.29628	1.24228	1.21639	0.919345	0.804354	1.18796	0.508125
0.852932	1.46101	1.42905	1.30221	0.951371	0.887881	0.836665	0.513801
0.662627	1.44202	1.2697	1.52538	1.05013	1.12698	1.20271	0.556116
0.321117	0.980604	1.31481	1.08195	1.38313	0.994733	0.92884	0.509171
0.741806	0.923643	0.942655	1.16751	1.08405	1.21768	0.861409	0.540845
1.06208		1.22952		1.08681		0.922871
