# Supplementary material for: AgRP1 modulates breeding season-dependent feeding behavior in female medaka
Source: eLife. 2025 May 29;13:RP100996. doi: 10.7554/eLife.100996 (PMC12122003; doi:10.7554/eLife.100996)
Supplement: Figure 3—figure supplement 1—source data 1. [file elife-100996-fig3-figsupp1-data1.xlsx]

## Sheet: Figure 3-sup A
min	60	90	120	150	180	210	240	270	300
LD1	0	2	36	42	45	53	54	56	57
LD2	0	56	68	72	72	73	75	77	77
LD3	0	13	22	40	43	55	61	68	70
LD4	0	73	78	91	95	100	104	109	109
LD5	0	66	76	79	86	89	92	96	100
SD1	0	24	25	29	33	35	35	40	40
SD2	0	1	14	17	19	21	27	29	31
SD3	0	45	62	62	62	71	71	72	75
SD4	0	7	14	27	35	36	36	34	40
SD5	0	32	36	40	45	47	48	50	50

## Sheet: Figure 3-sup B
Figure 3E
LD	SD
0.0350877	0.6
0.727273	0.0322581
0.185714	0.6
0.669725	0.175
0.66	0.64
