# Supplementary material for: AgRP1 modulates breeding season-dependent feeding behavior in female medaka
Source: eLife. 2025 May 29;13:RP100996. doi: 10.7554/eLife.100996 (PMC12122003; doi:10.7554/eLife.100996)
Supplement: Figure 3—source data 1. [file elife-100996-fig3-data1.xlsx]

## Sheet: Figure 3A
Figure 3A
LD	SD
1.35783	0.611014
1.12836	0.469301
1.57631	0.624054
1.21861	0.937361
0.826243	0.957863
1.2659	0.994777
1.51648	1.08152
1.31242	0.598714

## Sheet: Figure 3C
Figure 3C
LD	SD
57	40
77	31
70	75
109	40
100	50

## Sheet: Figure 3D
Figure 3D
LD	SD
1.19702	0.685772
1.57547	0.857333
1.04986	0.612457
0.941756	0.526919
0.936364	0.578386
0.976338	0.330822
1.17882	0.604551
1.02374	0.541461

## Sheet: Figure 3E
Figure 3E
LD	SD
209	156
262	177
237	240
193	246
223	153
