# Supplementary material for: AgRP1 modulates breeding season-dependent feeding behavior in female medaka
Source: eLife. 2025 May 29;13:RP100996. doi: 10.7554/eLife.100996 (PMC12122003; doi:10.7554/eLife.100996)
Supplement: Figure 4—figure supplement 1—source data 1. [file elife-100996-fig4-figsupp1-data1.xlsx]

## Sheet: Sheet1
LD	SD
1.45118	0.918639
0.998521	1.6642
0.772189	0.81213
1.61095	1.10503
0.785503	0.838757
0.599112	0.918639
1.42456	0.652367
1.19822	0.865385
1.21154	1.22485
0.892012
