# Supplementary material for: AgRP1 modulates breeding season-dependent feeding behavior in female medaka
Source: eLife. 2025 May 29;13:RP100996. doi: 10.7554/eLife.100996 (PMC12122003; doi:10.7554/eLife.100996)
Supplement: Figure 4—source data 1. [file elife-100996-fig4-data1.xlsx]

## Sheet: Figure 4A
Figure 4A
	LD	SD
1	1.69126	0.870115
2	0.743532	0.992532
3	0.705229	0.989469
4	1.51495	0.594885
5	0.729315	0.912098
6	0.979139	1.00291
7	0.799491	1.50132
8	0.350429

## Sheet: Figure 4B
Figure 4B
	LD	SD
1	0.914837	1.44668
2	0.709037	1.1369
3	0.793797	1.12766
4	1.08082	1.75177
5	1.12624	1.13017
6	1.55408	1.16654
7	1.66037	1.00826
8	1.33542
