# Supplementary material for: AgRP1 modulates breeding season-dependent feeding behavior in female medaka
Source: eLife. 2025 May 29;13:RP100996. doi: 10.7554/eLife.100996 (PMC12122003; doi:10.7554/eLife.100996)
Supplement: Figure 5—figure supplement 1—source data 1. [file elife-100996-fig5-figsupp1-data1.xlsx]

## Sheet: Sheet1
LD	SD
0.798769	1.05563
1.35393	0.914773
1.07221	1.04735
1.12192	1.26278
0.757339	0.997633
0.972775	1.05563
0.923059
