# Supplementary material for: AgRP1 modulates breeding season-dependent feeding behavior in female medaka
Source: eLife. 2025 May 29;13:RP100996. doi: 10.7554/eLife.100996 (PMC12122003; doi:10.7554/eLife.100996)
Supplement: Figure 5—source data 1. [file elife-100996-fig5-data1.xlsx]

## Sheet: Figure 5A
Figure 5A
	Sham	OVX+DMSO	OVX+E
1	1.12821	0.660635	2.22354
2	0.96368	0.753914	0.594228
3	1.06602	1.03677	2.64076
4	0.930244	0.700767	1.1668
5	0.889813	0.491192	1.41539
6	1.21602	0.651088	1.38631
7			1.07044

## Sheet: Figure 5B
Figure 5B
	Sham	OVX+DMSO	OVX+E
1	0.886622	0.510401	0.845607
2	0.707904	0.755236	0.660256
3	1.33129	0.408786	0.770175
4	0.986507	0.845184	0.499199
5	1.27657	0.988009	0.780792
6	1.03697	0.805935	0.788706
7			0.921104
