# Supplementary material for: AgRP1 modulates breeding season-dependent feeding behavior in female medaka
Source: eLife. 2025 May 29;13:RP100996. doi: 10.7554/eLife.100996 (PMC12122003; doi:10.7554/eLife.100996)
Supplement: Figure 6—figure supplement 2—source data 1. [file elife-100996-fig6-figsupp2-data1.xlsx]

## Sheet: Sheet1
WT	Hetero	Homo
1.01457	0.812145	0.458825
0.97163	0.830547	0.354547
0.983898	1.40469	0.385217
1.01457	1.03297	0.397485
0.763073	0.97163	0.336145
1.12498	0.775341
1.03297	0.855084
1.09431
