# Supplementary material for: AgRP1 modulates breeding season-dependent feeding behavior in female medaka
Source: eLife. 2025 May 29;13:RP100996. doi: 10.7554/eLife.100996 (PMC12122003; doi:10.7554/eLife.100996)
Supplement: Figure 6—source data 1. [file elife-100996-fig6-data1.xlsx]

## Sheet: Figure 6A
Body Weight			Body length			Abdominal hight
WT	KO		WT	KO		WT	KO
330	214		26.4289	24.083		6.90804	5.27758
308	212		26.0562	24.6536		6.59527	5.17233
297	261		26.6326	26.696		6.31513	5.50657
271	228		24.6112	25.6982		6.43479	5.33894
210	215		22.4924	24.0351		5.73357	5.31253
305	198		26.7963	24.3464		6.55739	4.89373

## Sheet: Figure 6B
WT	KO
1.36849	0.466328
0.675985	0.601017
0.771283	0.510801
1.03177	0.612452
0.987294	0.421855
1.16518	0.739517

## Sheet: Figure 6C
AgRP knockout
LD	SD
1.41556	0.447818
1.16888	1.04554
0.817837	1.23529
0.912713	1.04554
0.827324	0.43833
1.15939	0.789374
0.912713	1.06452
0.874763
0.912713

## Sheet: Figure 6D
Number of eggs
WT	KO
15	3
9	9
9	5
16	2
9	4
10

## Sheet: Figure 6E
WT	KO
5	5.79
7.69	6.08
6.56	4.6
7.56	6.27
6.48	6.93
8.26	4.34

## Sheet: Figure 6F
LH				FSH
WT	KO			WT	KO
1.44813	0.602246			0.942503	0.576964
1.18742	0.760548			1.30163	0.851154
0.97299	0.855097			0.462047	0.646549
0.94969	0.446714			1.00162	0.425964
0.832399	0.825535			0.91527	0.422499
0.841002	0.631083			0.919183	0.825732
